# Supplementary material for: Modeling the circadian regulation of the immune system: Sexually dimorphic effects of shift work
Source: PubMed Central journal article supplement (PMC8041207; doi:10.1371/journal.pcbi.1008514), 2021-03-31
Supplement: pcbi.1008514.s001.pdf [file pcbi.1008514.s001.pdf]

## Supporting Information

### Modeling the circadian regulation of the immune system: sexually dimorphic effects of shiftwork

Stéphanie M.C. Abo<sup>1\*</sup>, Anita T. Layton<sup>1,2</sup>

**1** Department of Applied Mathematics, University of Waterloo, Waterloo, Ontario, Canada

**2** Department of Biology and Schools of Computer Science and Pharmacology, University of Waterloo, Waterloo, Ontario, Canada

## Inventory of supporting information

### Supplemental tables

**Table A** List of variables of the mathematical model. Relates to Fig 1.

**Table B** Differential equations defining the mathematical model.

**Table C-J** List of the kinetic constants obtained by parameter identification.

**Table K** List of kinetic constants modified in CJL models.

**Table L** Percentage change in mean gene expression level due t CJL.

**Table M** Parameters studied for the Sobol' sensitivity analysis.

### The Sobol' sensitivity analysis

**Fig A** Sobol' indices for parameters modified by CJL.

**Fig B** Time course of total-order Sobol' indices for  $v_{max\_cry}$ ,  $k_{ass\_pc}$  and  $k_{ass\_cb}$ .

**Fig C** Computed simulation results for D, IL-6, TNF- $\alpha$  and IL-10.

**Fig D** Sobol' indices for the coupling parameters.

**Fig E** Time course of total-order Sobol' indices for the coupling parameters.

# 1 Supplemental Tables

**Table A. List of variables.** We adopt the notation where names with a mix of upper and lower case letters (e.g., *Per*) denote mRNAs, and names in all caps (e.g., *PER*) denote proteins.

| Variable name           | Description                                                        |
|-------------------------|--------------------------------------------------------------------|
| <i>Per</i>              | Concentration of <i>Per</i> mRNA                                   |
| <i>Cry</i>              | Concentration of <i>Cry</i> mRNA                                   |
| <i>Rev-Erb</i>          | Concentration of <i>Rev-Erb</i> mRNA                               |
| <i>Ror</i>              | Concentration of <i>Ror</i> mRNA                                   |
| <i>Bmal1</i>            | Concentration of <i>Bmal1</i> mRNA                                 |
| <i>PER</i>              | Concentration of <i>PER</i> protein                                |
| <i>CRY</i>              | Concentration of <i>CRY</i> protein                                |
| <i>REV-ERB</i>          | Concentration of <i>REV-ERB</i> protein                            |
| <i>ROR</i>              | Concentration of <i>ROR</i> protein                                |
| <i>BMAL1</i>            | Concentration of <i>BMAL1</i> protein                              |
| <i>PER-CRY</i>          | Concentration of <i>PER-CRY</i> protein                            |
| <i>CLOCK-BMAL1</i>      | Concentration of <i>CLOCK-BMAL1</i> protein                        |
| <i>P</i>                | Concentration of LPS                                               |
| <i>N</i>                | Total number of activated phagocytic cells                         |
| <i>D</i>                | Tissue damage marker                                               |
| <i>TNF</i>              | Concentration of <i>tumor necrosis factor-α</i>                    |
| <i>IL6</i>              | Concentration of <i>interleukin-6</i>                              |
| <i>IL10</i>             | Concentration of <i>interleukin-10</i>                             |
| <i>Y<sub>IL10</sub></i> | Tissue damage driven non-accessible <i>interleukin-10</i> promoter |
| <i>CA</i>               | Concentration of slow-acting anti-inflammatory mediators           |

**Table B. Differential equations defining the mathematical model.**

## Circadian genes and proteins (Eqs.1-12)

$$\begin{aligned} \frac{dPer(t)}{dt} = & -dm_{per} \cdot Per(t) \\ & + \frac{vmax_{per} \cdot \left(1 + fold_{per} \cdot \left(\frac{CLOCK-BMAL1(t)}{ka_{per\_cb}}\right)^{hill_{per\_cb}}\right)}{1 + \left(\frac{CLOCK-BMAL1(t)}{ka_{per\_cb}}\right)^{hill_{per\_cb}} \cdot \left(1 + \left(\frac{PER-CRY(t)}{ki_{per\_pc}}\right)^{hill_{per\_pc}}\right)}, \end{aligned} \quad (1)$$

$$\begin{aligned} \frac{dCry(t)}{dt} = & -dm_{cry} \cdot Cry(t) + \frac{1}{\left(1 + \left(\frac{REV-ERB(t)}{ki_{cry\_rev}}\right)^{hill_{cry\_rev}}\right)} \\ & \cdot \frac{vmax_{cry} \cdot \left(1 + fold_{cry} \cdot \left(\frac{CLOCK-BMAL1(t)}{ka_{cry\_cb}}\right)^{hill_{cry\_cb}}\right)}{1 + \left(\frac{CLOCK-BMAL1(t)}{ka_{cry\_cb}}\right)^{hill_{cry\_cb}} \cdot \left(1 + \left(\frac{PER-CRY(t)}{ki_{cry\_pc}}\right)^{hill_{cry\_pc}}\right)}, \end{aligned} \quad (2)$$

$$\begin{aligned} \frac{dRev-Erb(t)}{dt} = & -dm_{rev} \cdot Rev-Erb(t) \\ & + \frac{vmax_{rev} \cdot \left(1 + fold_{rev} \cdot \left(\frac{CLOCK-BMAL1(t)}{ka_{rev\_cb}}\right)^{hill_{rev\_cb}}\right)}{1 + \left(\frac{CLOCK-BMAL1(t)}{ka_{rev\_cb}}\right)^{hill_{rev\_cb}} \cdot \left(1 + \left(\frac{PER-CRY(t)}{ki_{rev\_pc}}\right)^{hill_{rev\_pc}}\right)}, \end{aligned} \quad (3)$$

$$\begin{aligned} \frac{dRor(t)}{dt} &= -dm_{ror} \cdot Ror(t) \\ &+ \frac{vmax_{ror} \cdot \left(1 + fold_{ror} \cdot \left(\frac{CLOCK-BMAL1(t)}{ka_{ror\_cb}}\right)^{hill_{ror\_cb}}\right)}{1 + \left(\frac{CLOCK-BMAL1(t)}{ka_{ror\_cb}}\right)^{hill_{ror\_cb}} \cdot \left(1 + \left(\frac{PER-CRY(t)}{ki_{ror\_pc}}\right)^{hill_{ror\_pc}}\right)}, \end{aligned} \quad (4)$$

$$\begin{aligned} \frac{dBmal1(t)}{dt} &= -dm_{bmal} \cdot Bmal1(t) \\ &+ \frac{x_P}{x_P + F_P(t)} \cdot \frac{vmax_{bmal} \cdot \left(1 + fold_{bmal} \cdot \left(\frac{ROR(t)}{ka_{bmal\_ror}}\right)^{hill_{bmal\_ror}}\right)}{1 + \left(\frac{REV-ERB(t)}{ka_{bmal\_rev}}\right)^{hill_{bmal\_rev}} + \left(\frac{ROR(t)}{ka_{bmal\_ror}}\right)^{hill_{bmal\_ror}}}, \end{aligned} \quad (5)$$

$$\begin{aligned} \frac{dPER(t)}{dt} &= -dp_{per} \cdot PER(t) + kp_{per} \cdot Per(t) \\ &- [kass_{pc} \cdot PER(t) \cdot CRY(t) - kdiss_{pc} \cdot PER-CRY(t)], \end{aligned} \quad (6)$$

$$\begin{aligned} \frac{dCRY(t)}{dt} &= -dp_{cry} \cdot CRY(t) + kp_{cry} \cdot Cry(t) \\ &- [kass_{pc} \cdot PER(t) \cdot CRY(t) - kdiss_{pc} \cdot PER-CRY(t)], \end{aligned} \quad (7)$$

$$\frac{dREV-ERB(t)}{dt} = -dp_{rev} \cdot REV-ERB(t) + kp_{rev} \cdot Rev-Erb(t), \quad (8)$$

$$\frac{dROR(t)}{dt} = -dp_{ror} \cdot ROR(t) + kp_{ror} \cdot Ror(t), \quad (9)$$

$$\begin{aligned} \frac{dBMAL1(t)}{dt} &= -dp_{bmal} \cdot BMAL1(t) + kp_{bmal} \cdot Bmal1(t) \\ &- kass_{cb} \cdot BMAL1(t) + kdiss_{cb} \cdot CLOCK-BMAL1(t), \end{aligned} \quad (10)$$

$$\begin{aligned} \frac{dPER-CRY(t)}{dt} &= kass_{pc} \cdot PER(t) \cdot CRY(t) \\ &- kdiss_{pc} \cdot PER-CRY(t) - d_{pc} \cdot PER-CRY(t), \end{aligned} \quad (11)$$

$$\begin{aligned} \frac{dCLOCK-BMAL1(t)}{dt} &= [kass_{cb} \cdot BMAL1(t) - kdiss_{cb} \cdot CLOCK-BMAL1(t)] \\ &- d_{cb} \cdot CLOCK-BMAL1(t), \end{aligned} \quad (12)$$

## Immune system agents (Eqs.13-20)

### Endotoxin concentration

$$\frac{dP(t)}{dt} = -d_p \cdot P(t), \quad (13)$$

The endotoxin insult injected intraperitoneally in the rats is a bolus administration, which initiates the inflammatory cascade. The initial conditions for  $P$  are either 3, 6, or 12 mg/kg depending on the endotoxin dose level.

### Total number of activated phagocytic cells

$$\frac{dN(t)}{dt} = k_N \cdot \left( \frac{R(t)}{x_N + R(t)} \right) - d_N \cdot N(t), \quad (14)$$

$$\begin{aligned} R(t) &= [k_{NP} \cdot P(t) + k_{ND} \cdot D(t)] \cdot fDN_{NCA}(t) \cdot fDN_{NIL10}(t) \\ &\quad \cdot (1 + k_{NTNF} \cdot fUP_{NTNF}(t)) \cdot (1 + k_{NIL6} \cdot fUP_{NIL6}(t)) \\ fUP_{NTNF}(t) &= \frac{TNF(t)}{x_{NTNF} + TNF(t)} \\ fUP_{NIL6}(t) &= \frac{IL6(t)}{x_{NIL6} + IL6(t)} \\ fDN_{NCA}(t) &= \frac{x_{NCA}}{x_{NCA} + CA(t)} \\ fDN_{NIL10}(t) &= \frac{x_{NIL10}}{x_{NIL10} + IL10(t)} \end{aligned}$$

The initial condition is  $N(0) = 0$ .

### Tissue damage marker

$$\frac{dD(t)}{dt} = k_D \cdot \frac{IL6(t)^4}{x_D^4 + IL6(t)^4} + k_P \frac{P(t)}{x_P + P(t)} - d_D \cdot D(t), \quad (15)$$

The initial condition is  $D(0) = 0$ .

### Concentration of interleukin-6

$$\begin{aligned} \frac{dIL-6(t)}{dt} &= k_{IL6} \cdot \frac{N(t)^4}{x_{IL6}^4 + N(t)^4} \cdot fDN_{IL6IL10}(t) \cdot fDN_{IL6CA}(t) \cdot fDN_{IL6REV}(t) \\ &\quad \cdot [1 + k_{IL6TNF} \cdot fUP_{IL6TNF}(t) + k_{IL6IL6} \cdot fUP_{IL6IL6}(t)] - d_{IL6} \cdot IL6(t), \end{aligned} \quad (16)$$

$$\begin{aligned} fUP_{IL6TNF}(t) &= \frac{TNF(t)}{x_{IL6TNF} + TNF(t)} \\ fUP_{IL6IL6}(t) &= \frac{IL6(t)}{x_{IL6IL6} + IL6(t)} \\ fDN_{IL6IL10}(t) &= \frac{x_{IL6IL10}}{x_{IL6IL10} + IL10(t)} \\ fDN_{IL6CA}(t) &= \frac{x_{IL6CA}}{x_{IL6CA} + CA(t)} \\ fDN_{IL6REV}(t) &= \frac{x_{IL6REV}}{x_{IL6REV} + REV(t)} \end{aligned}$$

The initial condition is  $IL-6(0)=0$ .

### Concentration of tumor necrosis factor $\alpha$

$$\begin{aligned} \frac{dTNF-\alpha(t)}{dt} = & k_{TNF} \cdot N(t)^{1.5} \cdot [1 + k_{TNFTNF} \cdot fUP_{TNFTNF}(t)] \cdot fDN_{TNFCA}(t) \cdot fDN_{TNFIL10}(t) \\ & \cdot fDN_{TNFIL6}(t) \cdot fDN_{TNFCRY}(t) \cdot fDN_{TNFROR}(t) - d_{TNF} \cdot TNF(t), \end{aligned} \quad (17)$$

$$\begin{aligned} fUP_{TNFTNF}(t) &= \frac{TNF(t)}{x_{TNFTNF} + TNF(t)} \\ fDN_{TNFCA}(t) &= \frac{x_{TNFCA}^6}{x_{TNFCA}^6 + CA(t)^6} \\ fDN_{TNFIL10}(t) &= \frac{x_{TNFIL10}}{x_{TNFIL10} + IL10(t)} \\ fDN_{TNFIL6}(t) &= \frac{x_{TNFIL6}}{x_{TNFIL6} + IL6(t)} \\ fDN_{TNFCRY}(t) &= \frac{x_{TNFCRY}}{x_{TNFCRY} + CRY(t)} \\ fDN_{TNFROR}(t) &= \frac{x_{TNFROR}}{x_{TNFROR} + ROR(t)} \end{aligned}$$

The initial condition is  $TNF-\alpha(0) = 0$ .

### Concentration of interleukin-10

$$\begin{aligned} \frac{dIL10(t)}{dt} = & k_{IL10} \cdot \frac{N(t)^3}{x_{IL10}^3 + N(t)^3} \cdot [1 + k_{IL10IL6} \cdot fUP_{IL10IL6}(t) + k_{IL10TNF} \cdot fUP_{IL10TNF}(t)] \\ & \cdot fDN_{IL6REV}(t) - d_{IL10} \cdot fDN_{IL10d}(t) + Y_{IL10}(t) + s_{IL10}, \end{aligned} \quad (18)$$

$$\begin{aligned} fUP_{IL10IL6}(t) &= \frac{IL6(t)^4}{x_{IL10IL6}^4 + IL6(t)^4} \\ fUP_{IL10TNF}(t) &= \frac{TNF(t)}{x_{IL10TNF} + TNF(t)} \\ fDN_{IL10d}(t) &= \frac{x_{IL10d}}{x_{IL10d} + IL10(t)} \\ fDN_{IL10REV}(t) &= \frac{x_{IL10REV}}{x_{IL10REV} + REV(t)} \end{aligned}$$

The production of *IL-10* in the basal state is represented by the constant  $s_{IL10}$ . With  $N(0) = 0$ , the initial condition is  $IL-10(0) = \frac{s_{IL10} \cdot x_{IL10d}}{d_{IL10} \cdot x_{IL10d} - s_{IL10}}$ .

### Tissue damage driven non-accessible interleukin-10 promoter

$$\frac{dY_{IL10}(t)}{dt} = k_{IL102} \cdot \frac{D(t)^4}{x_{IL102}^4 + D(t)^4} - d_{IL102} \cdot Y_{IL10}(t), \quad (19)$$

The initial condition is  $Y_{IL10}(0) = 0$ .

### Anti-inflammatory moderator

$$\frac{dCA(t)}{dt} = k_{CA} \cdot N(t) - d_{CA} \cdot CA(t) + s_{CA}, \quad (20)$$

At basal conditions, the system is assumed to be slightly anti-inflammatory. This was achieved by introducing a constant,  $s_{CA}$ , into the ODE. Hence, with  $N(0) = 0$ , we obtain  $CA(0) = \frac{s_{CA}}{d_{CA}}$ .

LPS filter

$$F_P(t) = P_0 - \frac{P_0}{24}t. \quad (21)$$

where  $P_0 = P(t = 0)$ .  $F_P(0)$  is either 3, 6, or 12 mg/kg depending on the endotoxin dose level.

**Table C. mRNA and protein degradation rate constants (in  $h^{-1}$ )**

| Parameter | Value    | Description                                                  |
|-----------|----------|--------------------------------------------------------------|
| dm_per    | 0.10576  | <i>Per</i> mRNA degradation rate constant                    |
| dm_cry    | 0.50633  | <i>Cry</i> mRNA degradation rate constant                    |
| dm_rev    | 0.47914  | <i>Rev-Erb</i> mRNA degradation rate constant                |
| dm_ror    | 0.26786  | <i>Ror</i> mRNA degradation rate constant                    |
| dm_bmal   | 4.6995   | <i>Bmal1</i> mRNA degradation rate constant                  |
| dp_per    | 0.14989  | <i>PER</i> protein degradation rate constant                 |
| dp_cry    | 1.9105   | <i>CRY</i> protein degradation rate constant                 |
| dp_rev    | 0.28899  | <i>REV-ERB</i> protein degradation rate constant             |
| dp_ror    | 0.063637 | <i>ROR</i> protein degradation rate constant                 |
| dp_bmal   | 0.22534  | <i>BMAL1</i> protein degradation rate constant               |
| d_pc      | 0.22571  | <i>PER-CRY</i> protein complex degradation rate constant     |
| d_cb      | 0.1709   | <i>CLOCK-BMAL1</i> protein complex degradation rate constant |

**Table D. Maximal transcription rates (in  $nmol \cdot l^{-1} \cdot h^{-1}$ ).**

| Parameter | Value    | Description                                    |
|-----------|----------|------------------------------------------------|
| vmax_per  | 0.83525  | <i>Per</i> mRNA maximal transcription rate     |
| vmax_cry  | 1.0418   | <i>Cry</i> mRNA maximal transcription rate     |
| vmax_rev  | 0.065746 | <i>Rev-Erb</i> mRNA maximal transcription rate |
| vmax_ror  | 7.2287   | <i>Ror</i> mRNA maximal transcription rate     |
| vmax_bmal | 0.29055  | <i>Bmal1</i> mRNA maximal transcription rate   |

**Table E. Activation ratios (dimensionless)**

| Parameter | Value    | Description                                              |
|-----------|----------|----------------------------------------------------------|
| fold_per  | 0.12156  | Activation ratio of <i>Per</i> by <i>CLOCK-BMAL1</i>     |
| fold_cry  | 13.828   | Activation ratio of <i>Cry</i> by <i>CLOCK-BMAL1</i>     |
| fold_rev  | 130.78   | Activation ratio of <i>Rev-Erb</i> by <i>CLOCK-BMAL1</i> |
| fold_ror  | 0.078569 | Activation ratio of <i>Ror</i> by <i>CLOCK-BMAL1</i>     |
| fold_bmal | 43.306   | Activation ratio of <i>Bmal1</i> by <i>ROR</i>           |

**Table F. Regulation thresholds (in  $nmol/l$ )**

| Parameter   | Value     | Description                                                  |
|-------------|-----------|--------------------------------------------------------------|
| Ka_per_cb   | 3.3679    | Regulation threshold of <i>Per</i> by <i>CLOCK-BMAL1</i>     |
| Ki_per_pc   | 0.14178   | Regulation threshold of <i>Per</i> by <i>PER-CRY</i>         |
| Ka_cry_cb   | 1.5508    | Regulation threshold of <i>Cry</i> by <i>CLOCK-BMAL1</i>     |
| Ki_cry_pc   | 0.0027556 | Regulation threshold of <i>Cry</i> by <i>PER-CRY</i>         |
| Ki_cry_rev  | 0.64066   | Regulation threshold of <i>Cry</i> by <i>REV-ERB</i>         |
| Ka_rev_cb   | 0.18454   | Regulation threshold of <i>Rev-Erb</i> by <i>CLOCK-BMAL1</i> |
| Ki_rev_pc   | 550.46    | Regulation threshold of <i>Rev-Erb</i> by <i>PER-CRY</i>     |
| Ka_ror_cb   | 0.56517   | Regulation threshold of <i>Ror</i> by <i>CLOCK-BMAL1</i>     |
| Ki_ror_pc   | 0.072928  | Regulation threshold of <i>Ror</i> by <i>PER-CRY</i>         |
| Ka_bmal_ror | 0.076498  | Regulation threshold of <i>Bmal1</i> by <i>ROR</i>           |
| Ki_bmal_rev | 0.0002375 | Regulation threshold of <i>Bmal1</i> by <i>REV-ERB</i>       |

**Table G. Hill coefficients (dimensionless)**

| Parameter     | Value   | Description                                                         |
|---------------|---------|---------------------------------------------------------------------|
| hill_per_cb   | 17.025  | Hill coefficient regulation of <i>Per</i> by <i>CLOCK-BMAL1</i>     |
| hill_per_pc   | 22.829  | Hill coefficient regulation of <i>Per</i> by <i>PER-CRY</i>         |
| hill_cry_cb   | 7.4632  | Hill coefficient regulation of <i>Cry</i> by <i>CLOCK-BMAL1</i>     |
| hill_cry_pc   | 2.583   | Hill coefficient regulation of <i>Cry</i> by <i>PER-CRY</i>         |
| hill_cry_rev  | 58.733  | Hill coefficient regulation of <i>Cry</i> by <i>REV-ERB</i>         |
| hill_rev_cb   | 9.3373  | Hill coefficient regulation of <i>Rev-Erb</i> by <i>CLOCK-BMAL1</i> |
| hill_rev_pc   | 0.95847 | Hill coefficient regulation of <i>Rev-Erb</i> by <i>PER-CRY</i>     |
| hill_ror_cb   | 6.0371  | Hill coefficient regulation of <i>Ror</i> by <i>CLOCK-BMAL1</i>     |
| hill_ror_pc   | 3.2993  | Hill coefficient regulation of <i>Ror</i> by <i>PER-CRY</i>         |
| hill_bmal_ror | 2.8187  | Hill coefficient regulation of <i>Bmal1</i> by <i>ROR</i>           |
| hill_bmal_rev | 1.5678  | Hill coefficient regulation of <i>Bmal1</i> by <i>REV-ERB</i>       |

**Table H. Translation rates (in molecules per hour per mRNA)**

| Parameter | Value     | Description                     |
|-----------|-----------|---------------------------------|
| kp_per    | 0.77741   | <i>Per</i> translation rate     |
| kp_cry    | 0.9308    | <i>Cry</i> translation rate     |
| kp_rev    | 0.0004355 | <i>Rev-Erb</i> translation rate |
| kp_ror    | 0.010866  | <i>Ror</i> translation rate     |
| kp_bmal   | 0.97306   | <i>Bmal1</i> translation rate   |

**Table I. Complexation kinetic rates**

| Parameter | Value      | Unit                             | Description                           |
|-----------|------------|----------------------------------|---------------------------------------|
| kass_cb   | 0.0057803  | $h^{-1}$                         | <i>CLOCK-BMAL</i> association rate    |
| kass_pc   | 0.15187    | $nmol \cdot l^{-1} \cdot h^{-1}$ | <i>PER-CRY</i> association rate       |
| kdiss_cb  | 0.00022191 | $h^{-1}$                         | <i>CLOCK-BMAL</i> disassociation rate |
| kdiss_pc  | 0.23509    | $h^{-1}$                         | <i>PER-CRY</i> disassociation rate    |



Table J. Parameters of the inflammation model.

| Parameter                      | Value           | Unit                                    |
|--------------------------------|-----------------|-----------------------------------------|
| <b>Endotoxin</b>               |                 |                                         |
| $d_p$                          | 3               | $h^{-1}$                                |
| <b>Phagocytes</b>              |                 |                                         |
| $k_N$                          | 5.239009955e+07 | $h^{-1}$                                |
| $x_N$                          | 11.5345         | N-unit                                  |
| $d_N$                          | 0.195335        | $h^{-1}$                                |
| $k_{NP}$                       | 46.8879         | N-unit $\times$ kg/mg                   |
| $k_{ND}$                       | 0.01297224      | N-unit/D-unit                           |
| $x_{NTNF}$                     | 1530.0904       | pg/ml                                   |
| $x_{NIL6}$                     | 52121.3480      | pg/ml                                   |
| $x_{NCA}$                      | 0.0819918       | pg/ml                                   |
| $x_{NIL10}$                    | 138.3830        | pg/ml                                   |
| $k_{NTNF}$                     | 15.7694         |                                         |
| $k_{NIL6}$                     | 2.916366        |                                         |
| <b>Damage</b>                  |                 |                                         |
| $k_D$                          | 0.747386        | D-unit/h                                |
| $d_D$                          | 0.434761        | $h^{-1}$                                |
| $x_D$                          | 3572.1137       | pg/ml                                   |
| $k_P$                          | 1.385458        | D-unit/h                                |
| $x_P$                          | 0.5746          | mg/kg                                   |
| <b>Slow-acting cytokines</b>   |                 |                                         |
| $k_{CA}$                       | 1.381866e-09    | pg/(ml $\times$ h $\times$ N-unit)      |
| $d_{CA}$                       | 3.1777e-2       | $h^{-1}$                                |
| $s_{CA}$                       | 0.004           | pg/(ml $\times$ h)                      |
| <b>IL-6</b>                    |                 |                                         |
| $k_{IL6TNF}$                   | 23.15473        |                                         |
| $x_{IL6TNF}$                   | 1072.9657       | pg/ml                                   |
| $k_{IL6}$                      | 4.2094572e+07   | pg/(ml $\times$ h)                      |
| $d_{IL6}$                      | 0.410396        | $h^{-1}$                                |
| $x_{IL6}$                      | 2.012412e+08    | N-unit                                  |
| $x_{IL6IL10}$                  | 1.32377         | pg/ml                                   |
| $k_{IL6IL6}$                   | 101.1321        |                                         |
| $x_{IL6IL6}$                   | 14308.8692      | pg/ml                                   |
| $x_{IL6CA}$                    | 1.104116        | pg/ml                                   |
| <b>TNF-<math>\alpha</math></b> |                 |                                         |
| $k_{TNF}$                      | 9.326669e-08    | pg/(ml $\times$ N-unit <sup>1.5</sup> ) |
| $d_{TNF}$                      | 1.99835         | $h^{-1}$                                |
| $x_{TNFIL10}$                  | 6177.1302       | pg/ml                                   |
| $x_{TNFCA}$                    | 0.223434        | pg/ml                                   |
| $k_{TNFTNF}$                   | 0.198227        |                                         |
| $x_{TNFTNF}$                   | 8520.5658       | pg/ml                                   |
| $x_{TNFIL6}$                   | 40998.1848      | pg/ml                                   |
| <b>IL-10</b>                   |                 |                                         |
| $k_{IL10TNF}$                  | 0.212173        |                                         |
| $x_{IL10TNF}$                  | 8905.7477       | pg/ml                                   |
| $k_{IL10IL6}$                  | 3.27267         |                                         |
| $x_{IL10IL6}$                  | 22345.6179      | pg/ml                                   |
| $k_{IL10}$                     | 1.9301e+05      | pg/(ml $\times$ h)                      |
| $d_{IL10}$                     | 95.465          | $h^{-1}$                                |
| $x_{IL10}$                     | 5.938865e+07    | N-unit                                  |
| $s_{IL10}$                     | 1187.2          | pg/(ml $\times$ h)                      |

|                            |              |                    |
|----------------------------|--------------|--------------------|
| $x_{IL10d}$                | 713.8094     | pg/ml              |
| $Y_{IL10}$                 |              |                    |
| $k_{IL102}$                | 3.804797e+06 | $Y_{IL10}$ -unit/h |
| $d_{IL102}$                | 0.0224238    | $h^{-1}$           |
| $x_{IL102}$                | 8.470849     | D-unit             |
| <b>coupling parameters</b> |              |                    |
| $x_{IL6REV}$               | 0.009        | $nmol/l$           |
| $x_{IL10REV}$              | 0.004        | $nmol/l$           |
| $x_{TNFROR}$               | 0.4534       | $nmol/l$           |
| $x_{TNFCRY}$               | 0.4315       | $nmol/l$           |

**Table K. List of parameters modified in CJL models.**

| Parameter   | Control   | CJL male  | CJL female |
|-------------|-----------|-----------|------------|
| vmax_per    | 0.83525   | 2.1717    | 2.9568     |
| vmax_cry    | 1.0418    | unchanged | 1.6669     |
| vmax_rev    | 0.065746  | 0.1249    | 0.0164     |
| vmax_bmal   | 0.29055   | unchanged | 0.1511     |
| kdiss_pc    | 0.23509   | 0.6112    | 1.3315     |
| kdiss_cb    | 2.2191e-4 | unchanged | 1.1539e-4  |
| kass_pc     | 0.15187   | 0.0584    | 0.0268     |
| kass_cb     | 0.0057803 | unchanged | 0.0111     |
| Ki_bmal_rev | 2.375e-4  | 4.5125e-4 | 5.9375e-5  |
| Ki_cry_rev  | 0.64066   | 1.2173    | 0.1602     |

**Table L. Percentage change in mean gene expression level due to CJL**

| Gene             | CJL male | Experimental data [1] | CJL female | Experimental data [1] |
|------------------|----------|-----------------------|------------|-----------------------|
| Bmal1            | +3%      | Not significant       | -44%       | -43% $\pm$ 38%        |
| Per2             | +236%    | +230% $\pm$ 201%      | +510%      | +497% $\pm$ 234%      |
| Cry2             | +2%      | Not significant       | +69%       | +69% $\pm$ 18%        |
| Rev-Erb $\alpha$ | +103%    | +98% $\pm$ 96.5%      | -72%       | -70% $\pm$ 23%        |
| Ror              | +8%      | Not recorded          | +19%       | Not recorded          |

## 2 The Sobol' sensitivity analysis

The method of Sobol' [2] is a global and model independent sensitivity analysis method that is based on variance decomposition. Variance-based measures of sensitivity are attractive because they measure sensitivity across the whole input space, they can handle non-linear and non-monotonic functions and models. They can also measure the effect of interactions in such systems.

A first order index,  $S_i$ , is a measure for the variance contribution of the individual parameter to the total model variance, whereas a total order index,  $S_{T_i}$  is the result of the main effect of a given parameter and all its interactions with the other parameters. Note that for non-additive models as ours, interactions exist:  $S_{T_i}$  is greater than  $S_i$  and the sum of all  $S_i$  is less than 1. On the other hand, the sum of all  $S_{T_i}$  is greater than 1. By analyzing the difference between  $S_{T_i}$  and  $S_i$ , one can determine the impact of the interactions between a parameter of interest and the other parameters [3]. In this work, we will not discuss how to implement the Sobol' method, we refer to [2, 3] and the references therein.

## 2.1 The parameters considered for the sensitivity analysis

Based on our CJL male and CJL female models, 10 parameters are selected for the initial Sobol’ sensitivity analysis. The set includes all parameters which took new values after fitting the CJL models. Lower and upper bounds to the parameter input space are obtained by halving and doubling nominal values, respectively (see Table M). Our outputs of interest are IL-6, TNF- $\alpha$ , IL-10 and D because they convey the most information about the state inflammation, and are also directly affected by the circadian clock model. For each output, we report first and total order effects. We performed  $5000 \times (2 + \text{number of input parameters})$  simulations to derive the Sobol’ indices.

Table M. Parameters studied for the Sobol’ sensitivity analysis

| Parameter        | nominal value | lower bound | upper bound |
|------------------|---------------|-------------|-------------|
| $v_{max}^{per}$  | 0.83525       | 0.4176      | 1.6705      |
| $v_{max}^{cry}$  | 1.0418        | 0.5209      | 2.0836      |
| $v_{max}^{rev}$  | 0.065746      | 0.0329      | 0.1315      |
| $v_{max}^{bmal}$ | 0.29055       | 0.1453      | 0.5811      |
| kdiss_pc         | 0.23509       | 0.1175      | 0.4702      |
| kdiss_cb         | 2.2191e-4     | 1.110e-4    | 4.438e-4    |
| kass_pc          | 0.15187       | 0.0759      | 0.3037      |
| kass_cb          | 0.0057803     | 0.0029      | 0.0116      |
| Ki_bmal_rev      | 2.375e-4      | 1.188e-4    | 4.750e-5    |
| Ki_cry_rev       | 0.64066       | 0.3203      | 1.2813      |

## 2.2 Results of the Sobol’ sensitivity analysis

We calculated Sobol’ indices in order to assess the relative influence of each parameter. These values measure the relative sensitivity of the outcome to each parameter (first-order) and to all the interactions with the other parameters (total-order). Fig A shows that total output uncertainty is primarily induced by the parameters *kass\_pc*, PER-CRY association rate, and *vmax\_cry*, *Cry* mRNA maximal transcription rate, and how they interact with the other parameters.

The high sensitivity of D, IL-6, TNF- $\alpha$  and IL-10 to *kass\_pc* (Sobol index  $> 0.5$ ), is due to the consequential role of the complex PER-CRY in the circadian circuitry. Inhibitor proteins PER and CRY dimerize to inhibit their own transcription as well as that of REV-ERB and ROR by acting on CLOCK-BMAL1 protein complex [4]. Overall, D, IL-6 and IL-10 are less sensitive with respect to the parameter set tested (see Table M), whereas TNF- $\alpha$  is more sensitive to parameters affecting CRY and its related complex, PER-CRY.

Fig B shows the time course of the total-order Sobol’ indices for *vmax\_cry*, *kass\_pc* and *kass\_cb*, the three most influential parameters as shown in Fig A. D, IL-6 and IL-10 are sensitive *kass\_pc* and *vmax\_cry* throughout the inflammation, but the sensitivity of TNF- $\alpha$  to these parameters decreases over time. Moreover, the times of lower sensitivity of IL-10 to *kass\_pc*, correspond to the times of higher sensitivity of the cytokine to *kass\_cb*.

To assess the robustness of the outcomes to uncertainty in the input parameters in Table M, we plotted the computed simulation results showing the 90% quantile region for D, IL-6, TNF- $\alpha$  and IL-10 (see Fig C). Our results show that the inflammation output variables are qualitatively robust to uncertainty in the parameters that are modified by CJL.

## 2.3 Assessing sensitivities relative to coupling parameters

We extended our parameter input space to include all the clock model parameters and the coupling parameters. A sensitivity analysis of this larger parameter space allows us to assess how perturbations to the clock parameters can affect the output of the acute inflammation model, regardless of CJL. We performed  $5000 \times (2 + \text{number of input parameters})$  simulations to derive the Sobol’ indices.

Our results indicate that D, IL-6, TNF- $\alpha$  and IL-10 are most sensitive to the coupling parameters, as should be expected. Fig D shows the Sobol’ indices for the coupling parameters. These parameters directly

link clock proteins to cytokines, and thus inferences about the effect of parameters on inflammation can be extended to inferences about the associated clock protein on inflammation.

TNF- $\alpha$  is more sensitive to  $xTNFCRY$  and  $xTNFROR$  as CRY and ROR directly inhibit the production of the cytokine. IL-6 and IL-10 are sensitive to  $xIL6REV$  and  $xIL10REV$ , respectively. This is naturally explained by the direct inhibition of IL-6 and IL-10 by REV-ERB. We note that the damage marker, D, is sensitive to the same parameters as IL-6. This is to be expected because D is upregulated by IL-6.

Fig E shows the time course of the total-order Sobol' indices for the coupling parameters.

**IL-6 and Damage.** Both outcomes are sensitive to  $xIL6REV$  and  $xIL10REV$  throughout the duration of inflammation, but are also sensitive to  $xTNFCRY$  and  $xTNFROR$  at the beginning of inflammation. This indicates that most of the effect of the clock on the damage marker is induced by REV-ERB, but there exists an initial joint effect of REV-ERB, CRY and ROR on IL-6 and D. CRY and ROR act indirectly through their modulation of TNF- $\alpha$ .

**TNF- $\alpha$ .** The cytokine is particularly sensitive to  $xTNFCRY$  and  $xTNFROR$ . The sensitivity of TNF- $\alpha$  to  $xTNFCRY$  decreases as its sensitivity to  $xTNFROR$  increases during inflammation. Overall, ROR has a stronger influence on TNF- $\alpha$  compared to CRY. We note also the increased sensitivity of TNF- $\alpha$  to  $xIL10REV$  a few hours after the onset of inflammation. This is due to the inhibitory action of IL-10 on TNF- $\alpha$ .

**IL-10.** Throughout the period of inflammation, IL-10 is most sensitive to  $xIL6REV$  and  $xIL10REV$ . The Sobol' index for  $xIL10REV$  decreases shortly after the onset of inflammation, before rising again five hours post-infection. This suggests a role for REV-ERB in the formation of the first peak in IL-10 as well as the second peak that occurs 5h after the beginning of inflammation (see Fig 5 in the manuscript). IL-10 is also sensitive to  $xTNFCRY$  and  $xTNFROR$  at the start of inflammation. Since ROR and CRY inhibit TNF- $\alpha$ , the sensitivity of IL-10 to those parameters is because TNF- $\alpha$  peaks early during inflammation and activates its production.

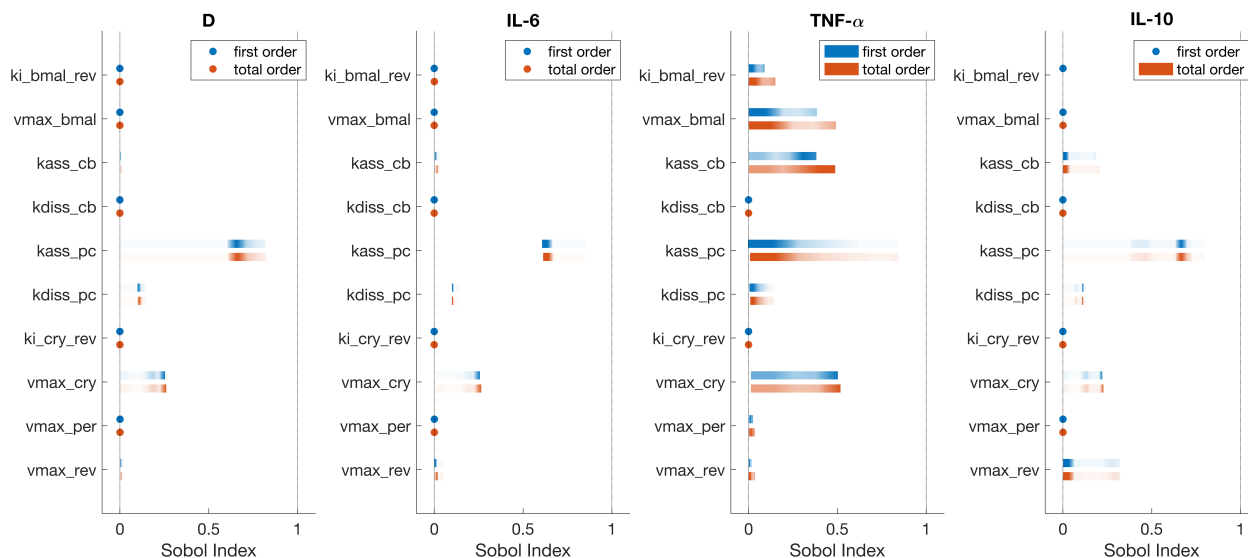

**Fig A. Sobol' indices for parameters modified by CJL.** Simulation of the baseline coupled model under acute inflammation with endotoxin dose  $3mg/kg$ . Circles imply no sensitivity to a parameter. A darker area on an index bar indicates sensitivity levels that persisted for most of the simulation time, while faded areas represent sensitivity levels that lasted for shorter periods of time. Infection occurs at CT12.

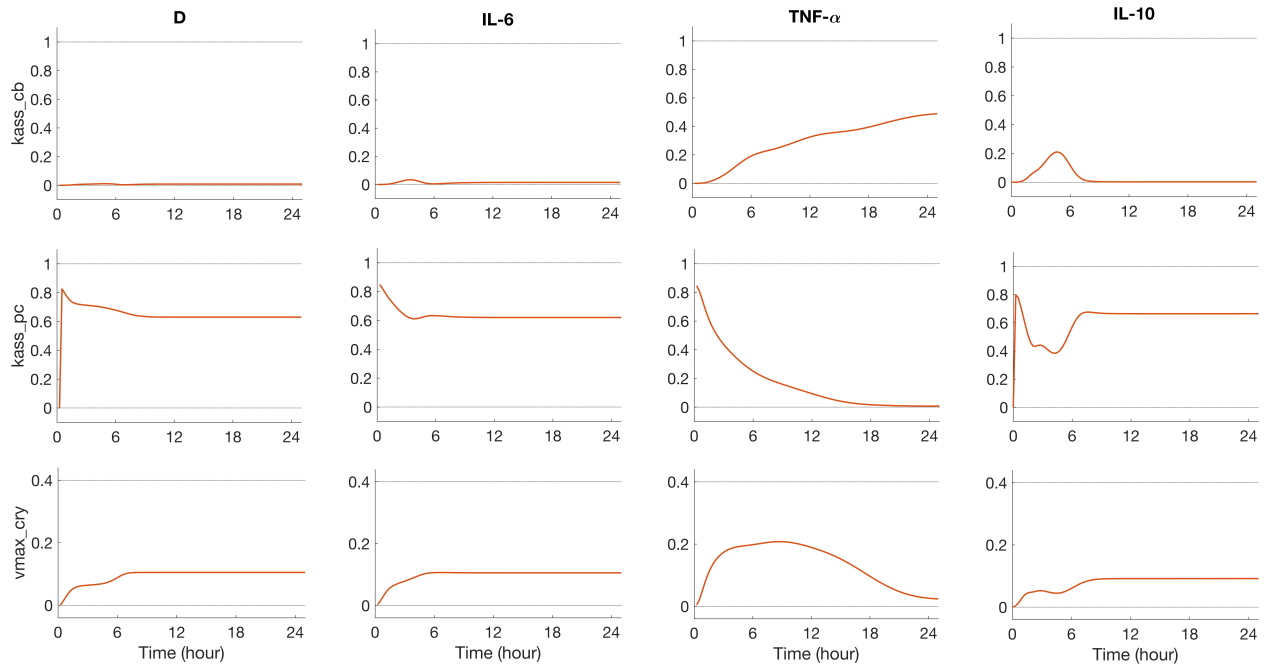

**Fig B.** Time course of total-order Sobol' indices for  $v_{max\_cry}$ ,  $kass\_pc$  and  $kass\_cb$ . Simulation of the baseline coupled model under acute inflammation with endotoxin dose  $3mg/kg$ . Infection occurs at CT12.

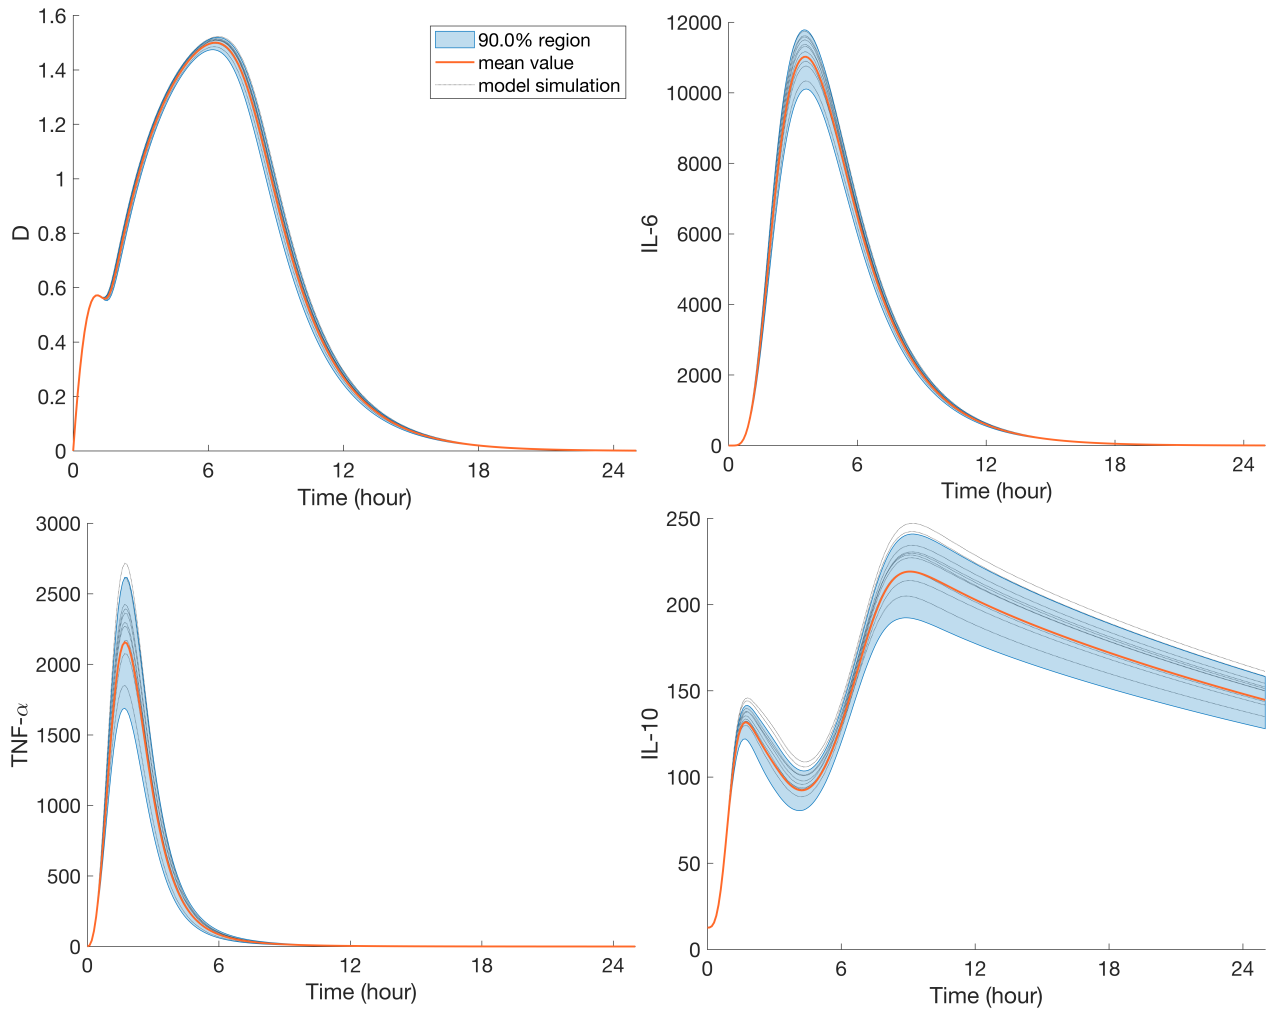

**Fig C. Computed simulation results for  $D$ ,  $IL-6$ ,  $TNF-\alpha$  and  $IL-10$ .** Simulation of the baseline coupled model under acute inflammation with endotoxin dose  $3mg/kg$ . Infection occurs at CT12. Parameters used in the sensitivity analysis are shown in Table M.

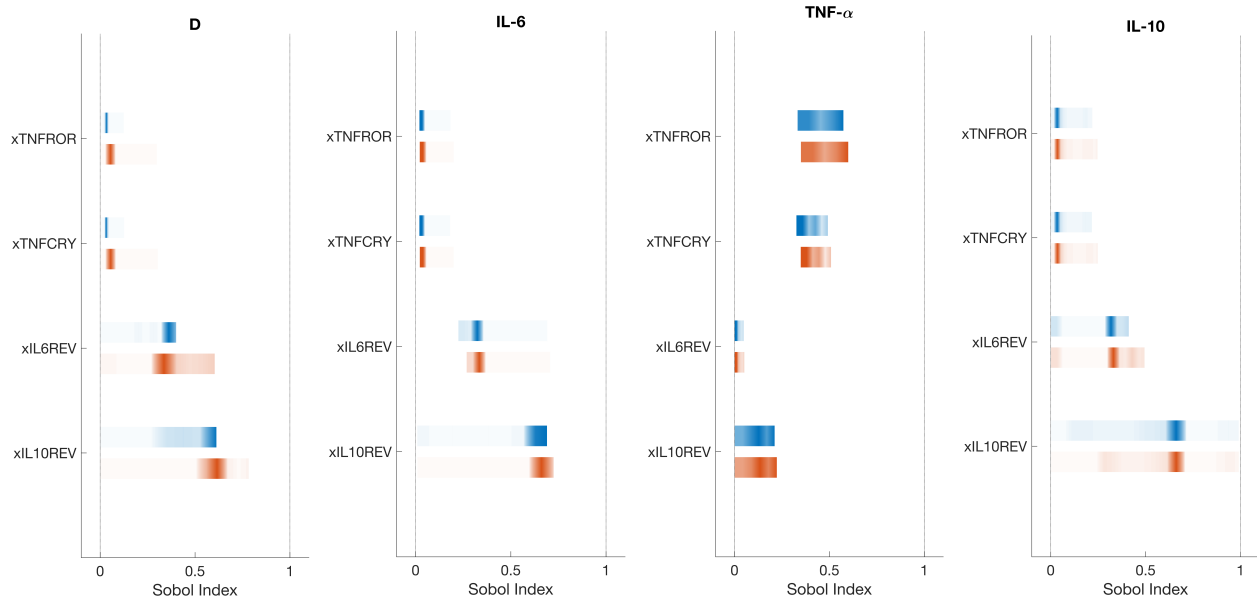

**Fig D. Sobol' indices for the coupling parameters.** Simulation of the baseline coupled model under acute inflammation with endotoxin dose  $3mg/kg$ . Circles imply no sensitivity to a parameter. A darker area on an index bar indicates sensitivity levels that persisted for most of the simulation time, while faded areas represent sensitivity levels that lasted for shorter periods of time. Infection occurs at CT12.

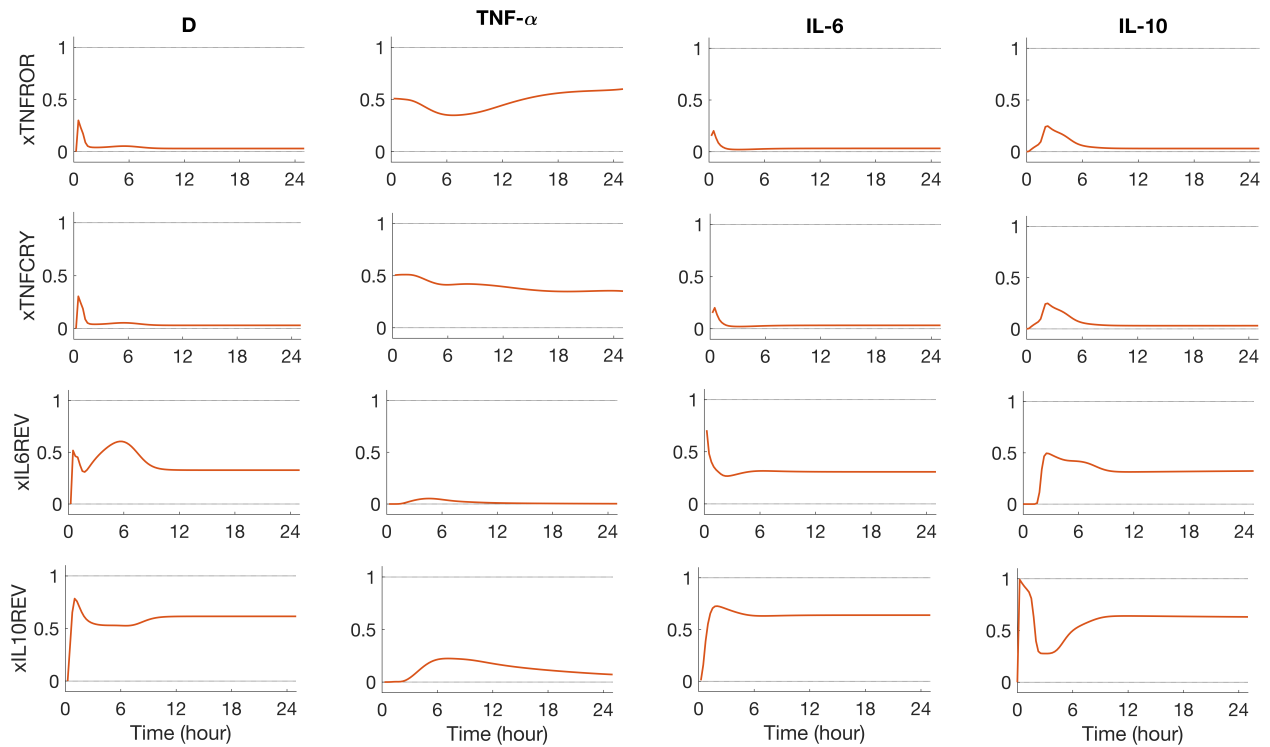

**Fig E. Time course of total-order Sobol' indices for the coupling parameters.** Simulation of the baseline coupled model under acute inflammation with endotoxin dose  $3mg/kg$ . Infection occurs at CT12.

## References

1. Hadden H, Soldin SJ, Massaro D. Circadian disruption alters mouse lung clock gene expression and lung mechanics. *J Appl Physiol.* 2012;113(3):385–392. doi:10.1152/jappphysiol.00244.2012.
2. Sobol' IM. On sensitivity estimation for nonlinear mathematical models. *Matematicheskoe modelirovanie.* 1990;2(1):112–118.
3. Nossent J, Elsen P, Bauwens W. Sobol'sensitivity analysis of a complex environmental model. *Environmental Modelling & Software.* 2011;26(12):1515–1525.
4. Dibner C, Schibler U, Albrecht U. The mammalian circadian timing system: organization and coordination of central and peripheral clocks. *Annu Rev Physiol.* 2010;72:517–549.
